# Supplementary material
Source: PubMed Central journal article supplement (PMC4195404)
Supplement: Supp_Data.pdf [file Supp_Data.pdf]

## Supplementary Data

### How to Stay Healthy and Lower Your Risks for Breast and Colon Cancer

- ❖ Exercise.
- ❖ Eat 5 fruits and vegetables each day.
- ❖ Do not smoke.
- ❖ Try not to drink alcohol.

### Breast Cancer Screening

- ❖ Have a mammogram every year beginning at age 40.
- ❖ Have a clinical breast exam every 3 years if you are in your 20s or 30s. If you are 40 or older, this should be done every year.
- ❖ Women should know how their breasts normally feel and report any breast change promptly to their health care providers. Breast self-exam (BSE) is an option for women starting in their 20s.

If you would like to schedule a mammogram at the downtown VCU Health System call (XXX) XXX-XXXX.

For a mammogram at Stony Point, call (XXX) XXX-XXXX.

### Colon Cancer Screening

- ❖ Beginning at age 50, use one of the tests below. Talk to your doctor about which test is best for you and how to schedule the test.

#### *Tests that find polyps and cancer*

- Flexible sigmoidoscopy every 5 years
- Colonoscopy every 10 years
- Double contrast barium enema every 5 years
- CT colonography (virtual colonoscopy) every 5 years

#### *Tests that mainly find cancer*

- Fecal occult blood test (FOBT) every year
- Fecal immunochemical test (FIT) every year
- Stool DNA test (sDNA)

---

These tips do not replace your doctor's advice. If you or your doctor has questions, please call (XXX) XXX-XXXX.
